# Supplementary material
Source: publisher figshare collection journal article supplement (https://frontiersin.figshare.com/ndownloader/files/15337796)

## Acquisition Information

| # | Image ID   | Acquire Time         | Channels | Resolution | Intensities | Image Name         | Comment | Image Modifications |
|---|------------|----------------------|----------|------------|-------------|--------------------|---------|---------------------|
| 1 | 0000162_01 | 9 août 2017 00:00:00 | 700 800  | 169um      | 5,0 5,0     | WB8.8.17LCerebGFAP |         |                     |

## Image Display Values

| Channel | Color                       | Minimum | Maximum | K |
|---------|-----------------------------|---------|---------|---|
| 700     | Gray Scale (Black on White) | 468     | 24900   | 1 |

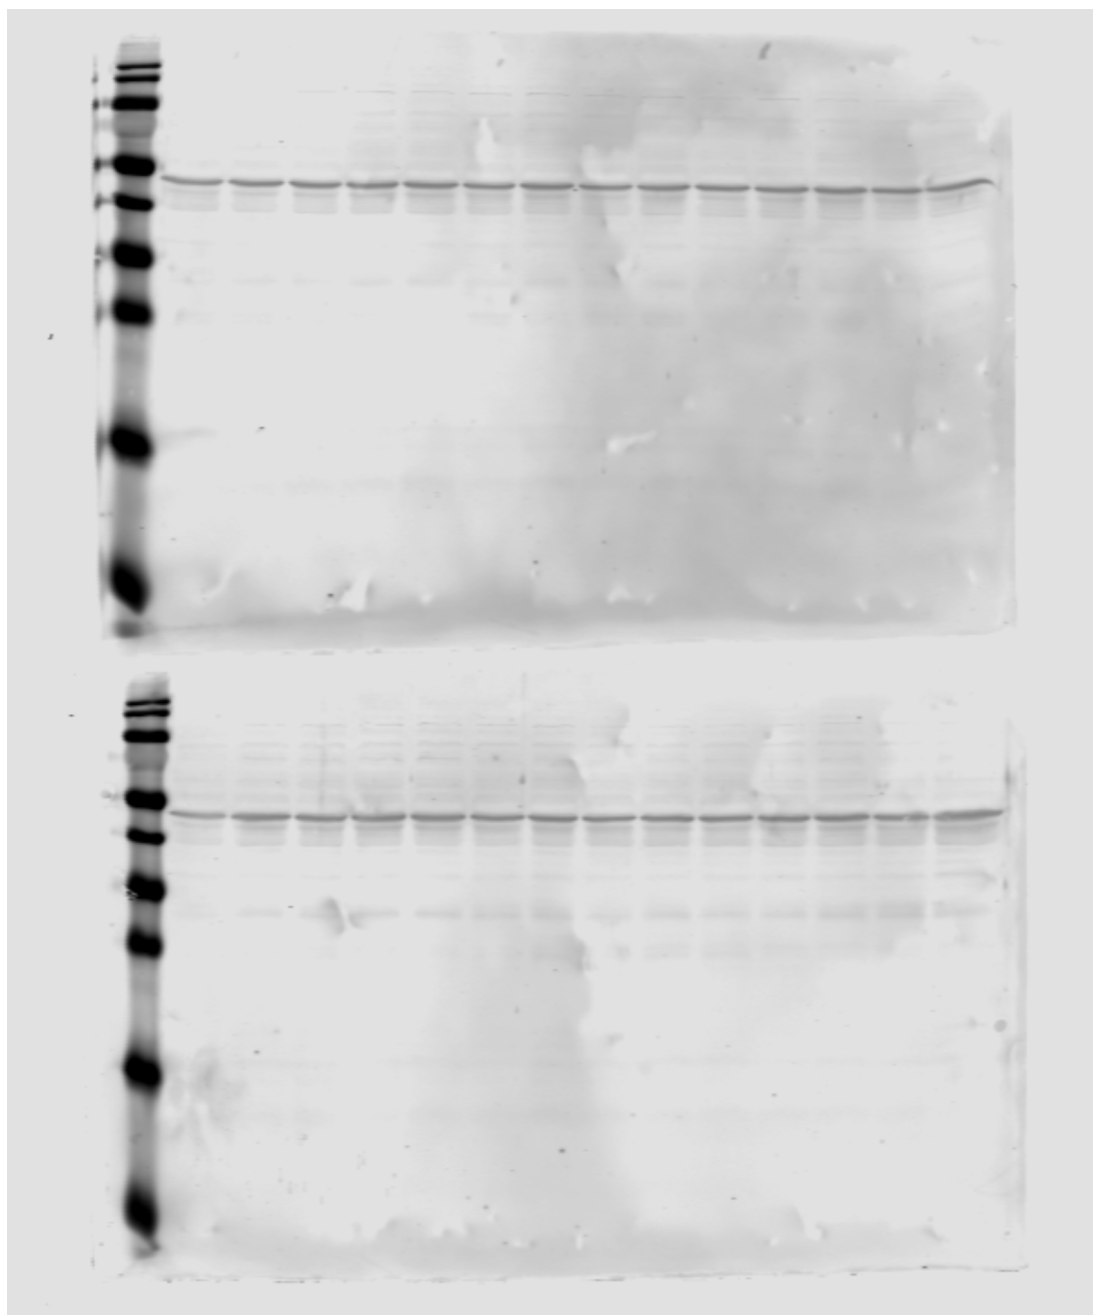

Acquisition Information

| # | Image ID   | Acquire Time         | Channels | Resolution | Intensities | Image Name         | Comment | Image Modifications |
|---|------------|----------------------|----------|------------|-------------|--------------------|---------|---------------------|
| 1 | 0000159_01 | 8 août 2017 00:00:00 | 700      | 169um      | 5,0 5,0     | WB7.8.17RCerebGFAP |         |                     |

Image Display Values

| Channel | Color                       | Minimum | Maximum | K |
|---------|-----------------------------|---------|---------|---|
| 700     | Gray Scale (Black on White) | 1940    | 7780    | 0 |

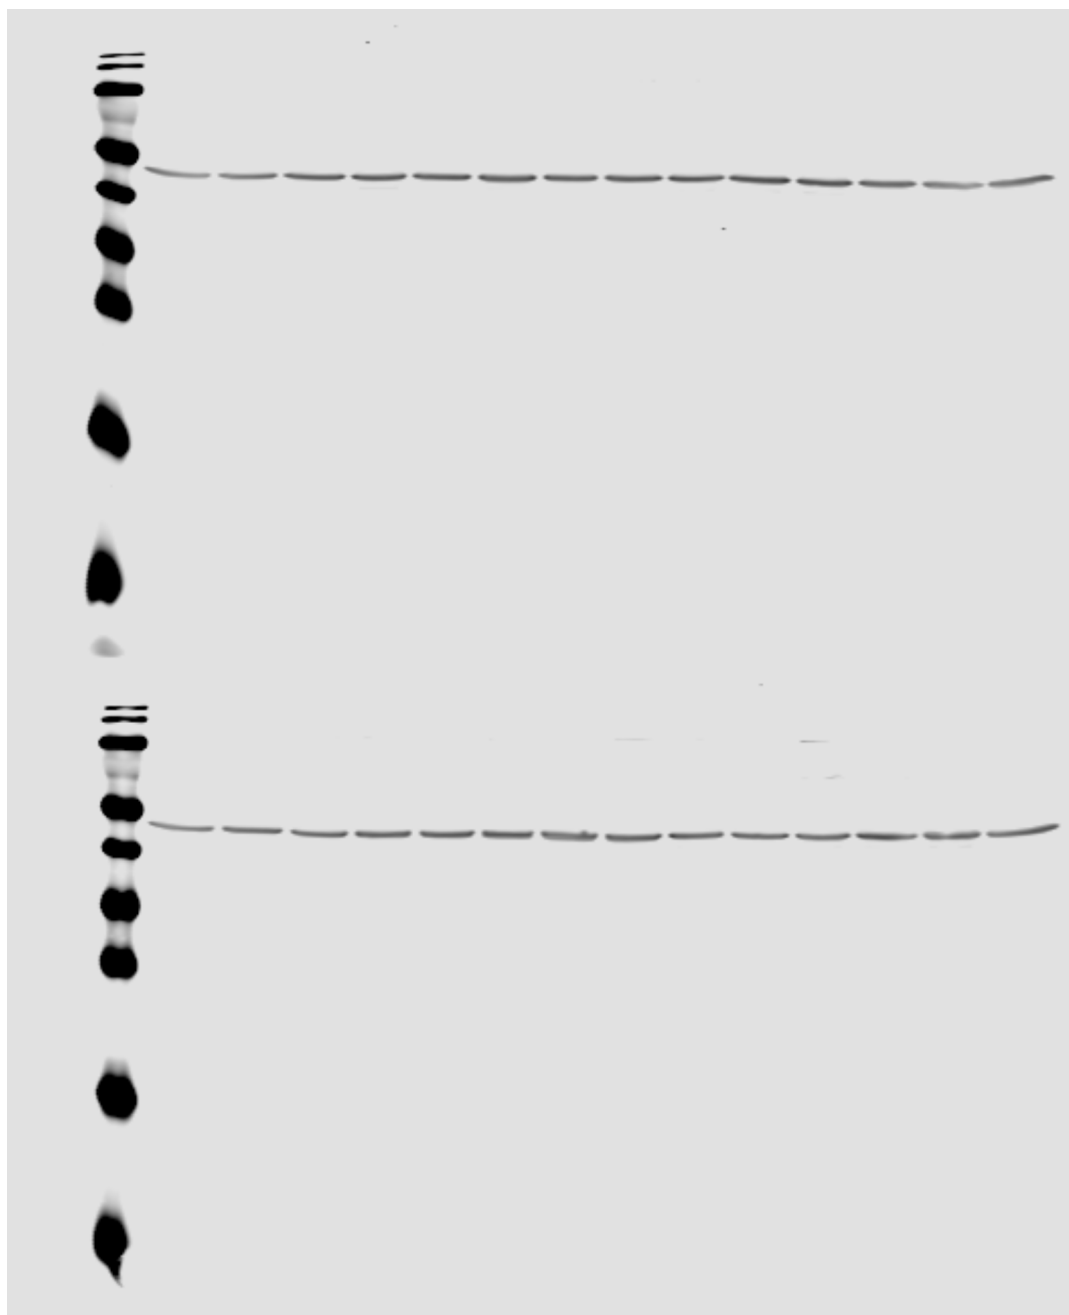

## Acquisition Information

| # | Image ID   | Acquire Time          | Channels | Resolution | Intensities | Image Name              | Comment |
|---|------------|-----------------------|----------|------------|-------------|-------------------------|---------|
| 1 | 0000163_01 | 10 août 2017 00:00:00 | 700 800  | 169um      | 5,0 5,0     | WB8.8.17LCerebMBPonGFAP |         |

## Image Display Values

| Channel | Color                       | Minimum | Maximum | K |
|---------|-----------------------------|---------|---------|---|
| 700     | Gray Scale (Black on White) | 25,9    | 2920    | 0 |
| 800     | Gray Scale (Black on White) | 48,0    | 369     | 1 |

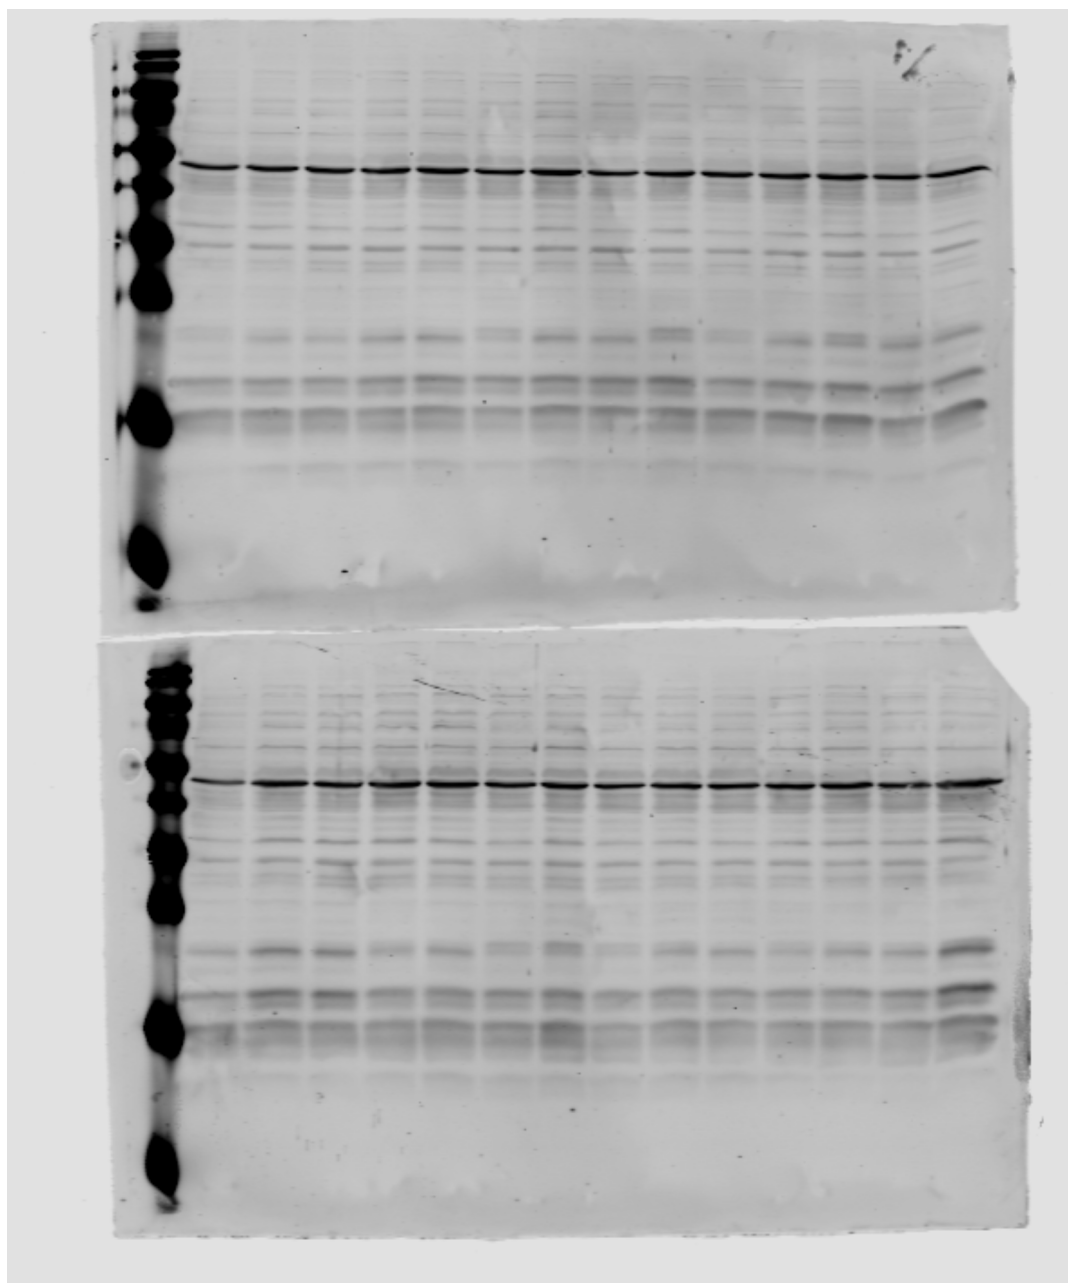

Acquisition Information

| # | Image ID   | Acquire Time         | Channels | Resolution | Intensities | Image Name              | Comment |
|---|------------|----------------------|----------|------------|-------------|-------------------------|---------|
| 1 | 0000160_01 | 9 août 2017 00:00:00 | 700 800  | 169um      | 5,0 5,0     | WB7.8.17RCerebMBPonGFAP |         |

Image Display Values

| Channel | Color                       | Minimum | Maximum | K |
|---------|-----------------------------|---------|---------|---|
| 700     | Gray Scale (Black on White) | 915     | 6590    | 1 |
| 800     | Gray Scale (Black on White) | 162     | 1330    | 0 |

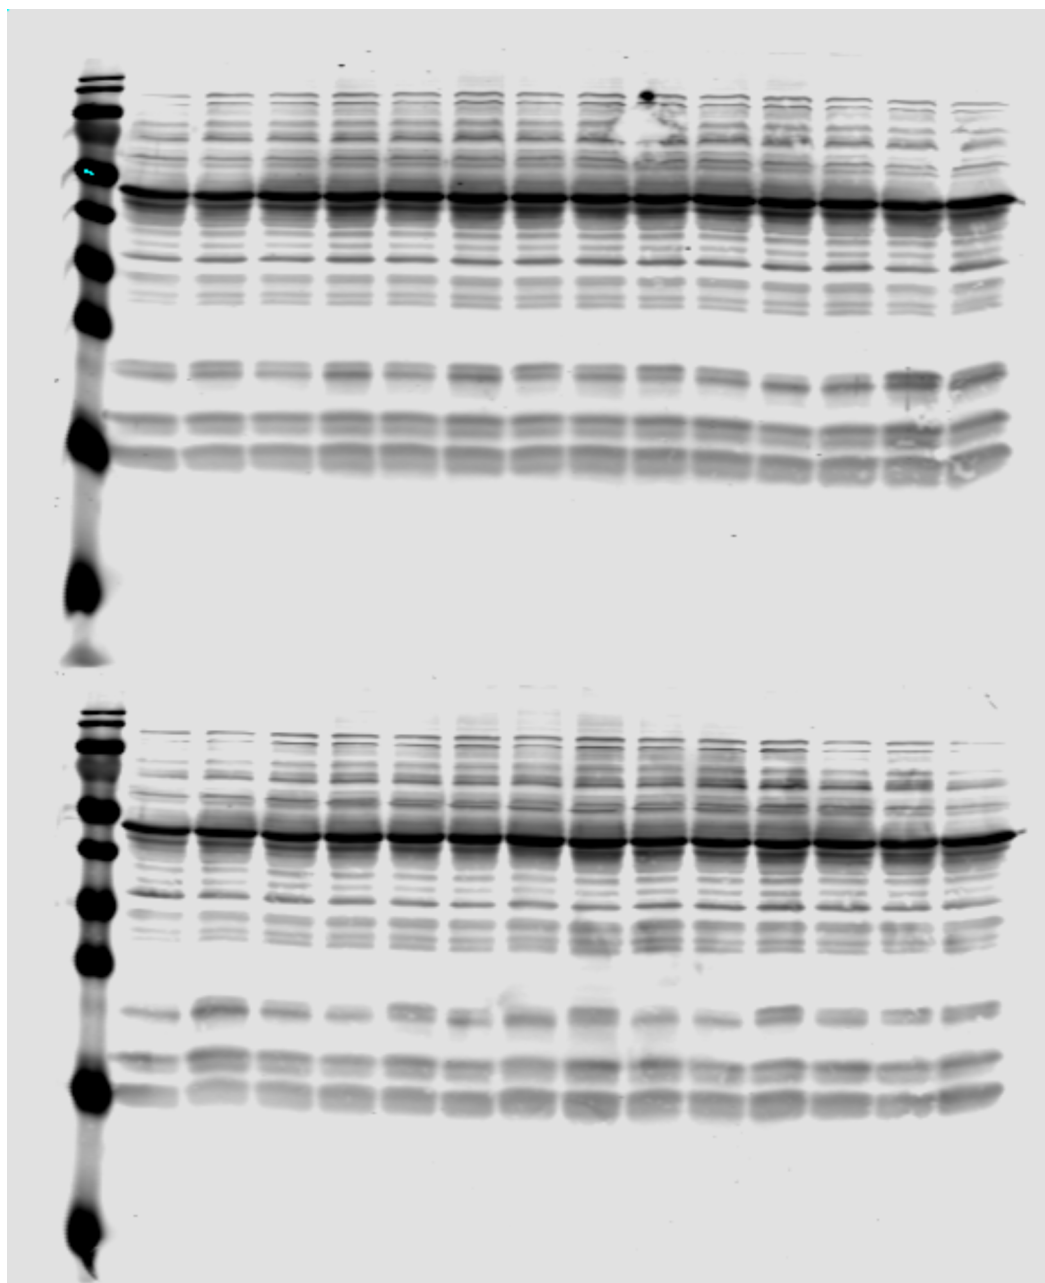

## Acquisition Information

| # | Image ID   | Acquire Time          | Channels | Resolution | Intensities | Image Name          | Comment | Image Modifications |
|---|------------|-----------------------|----------|------------|-------------|---------------------|---------|---------------------|
| 1 | 0000229_01 | 16 août 2017 00:00:00 | 700 800  | 169um      | 5,0 5,0     | WB15.8.17LCerebNeuN |         |                     |

## Image Display Values

| Channel | Color                       | Minimum | Maximum | K |
|---------|-----------------------------|---------|---------|---|
| 700     | Gray Scale (Black on White) | 844     | 8440    | 0 |

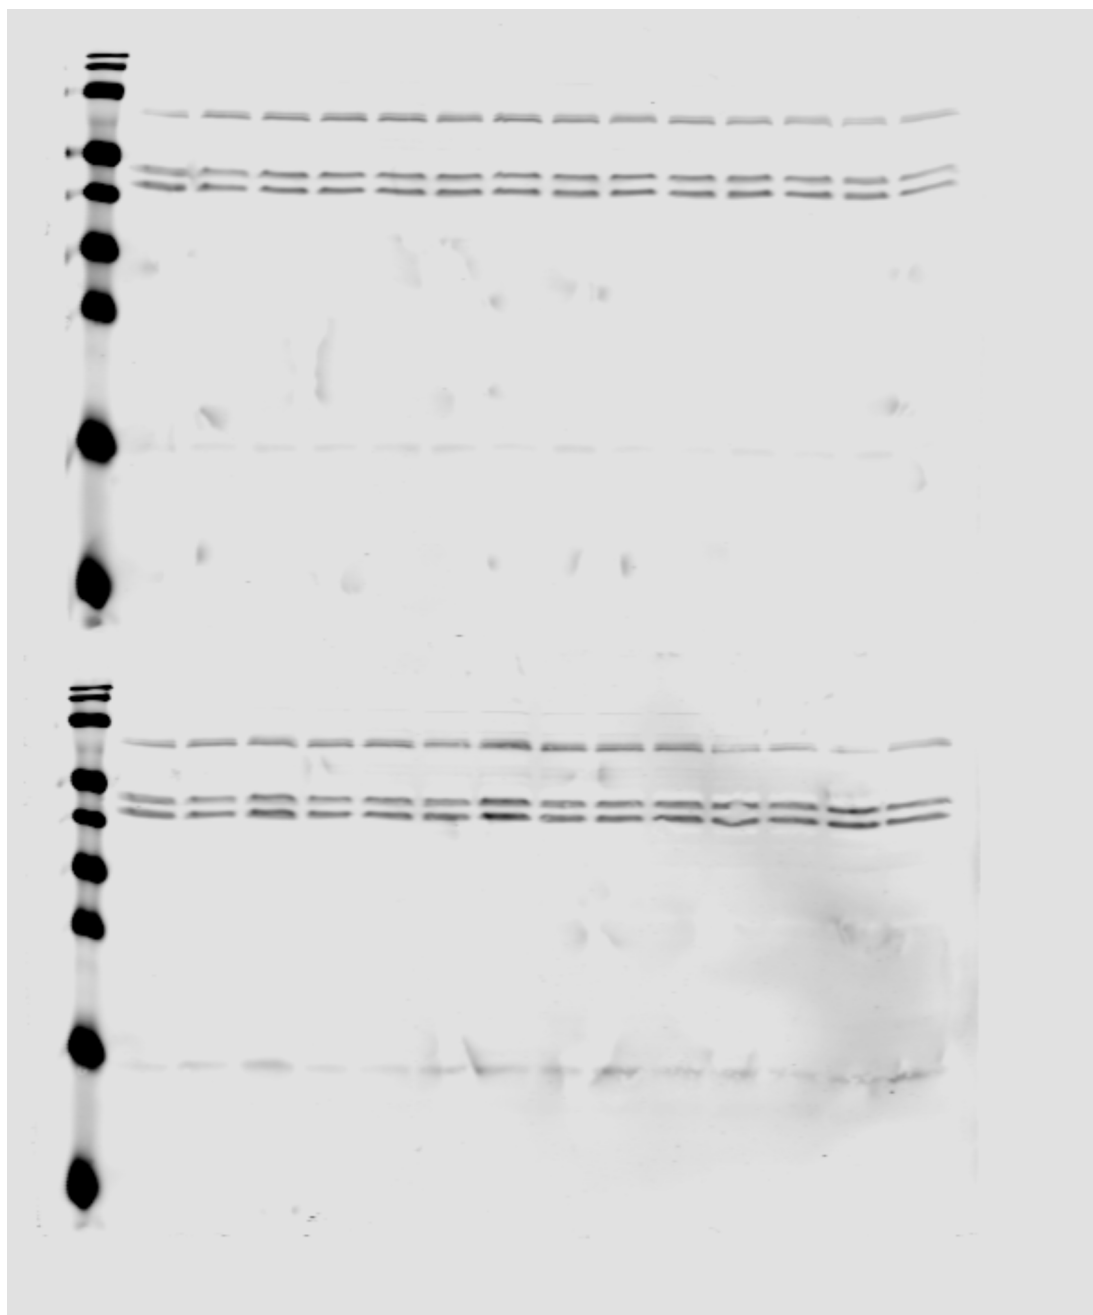

Acquisition Information

| # | Image ID   | Acquire Time          | Channels | Resolution | Intensities | Image Name          | Comment | Image Modifications |
|---|------------|-----------------------|----------|------------|-------------|---------------------|---------|---------------------|
| 1 | 0000158_01 | 15 août 2017 00:00:00 | 700 800  | 169um      | 5,0 5,0     | WB14.8.17RCerebNeuN |         |                     |

Image Display Values

| Channel | Color                       | Minimum | Maximum | K |
|---------|-----------------------------|---------|---------|---|
| 700     | Gray Scale (Black on White) | 904     | 17700   | 1 |

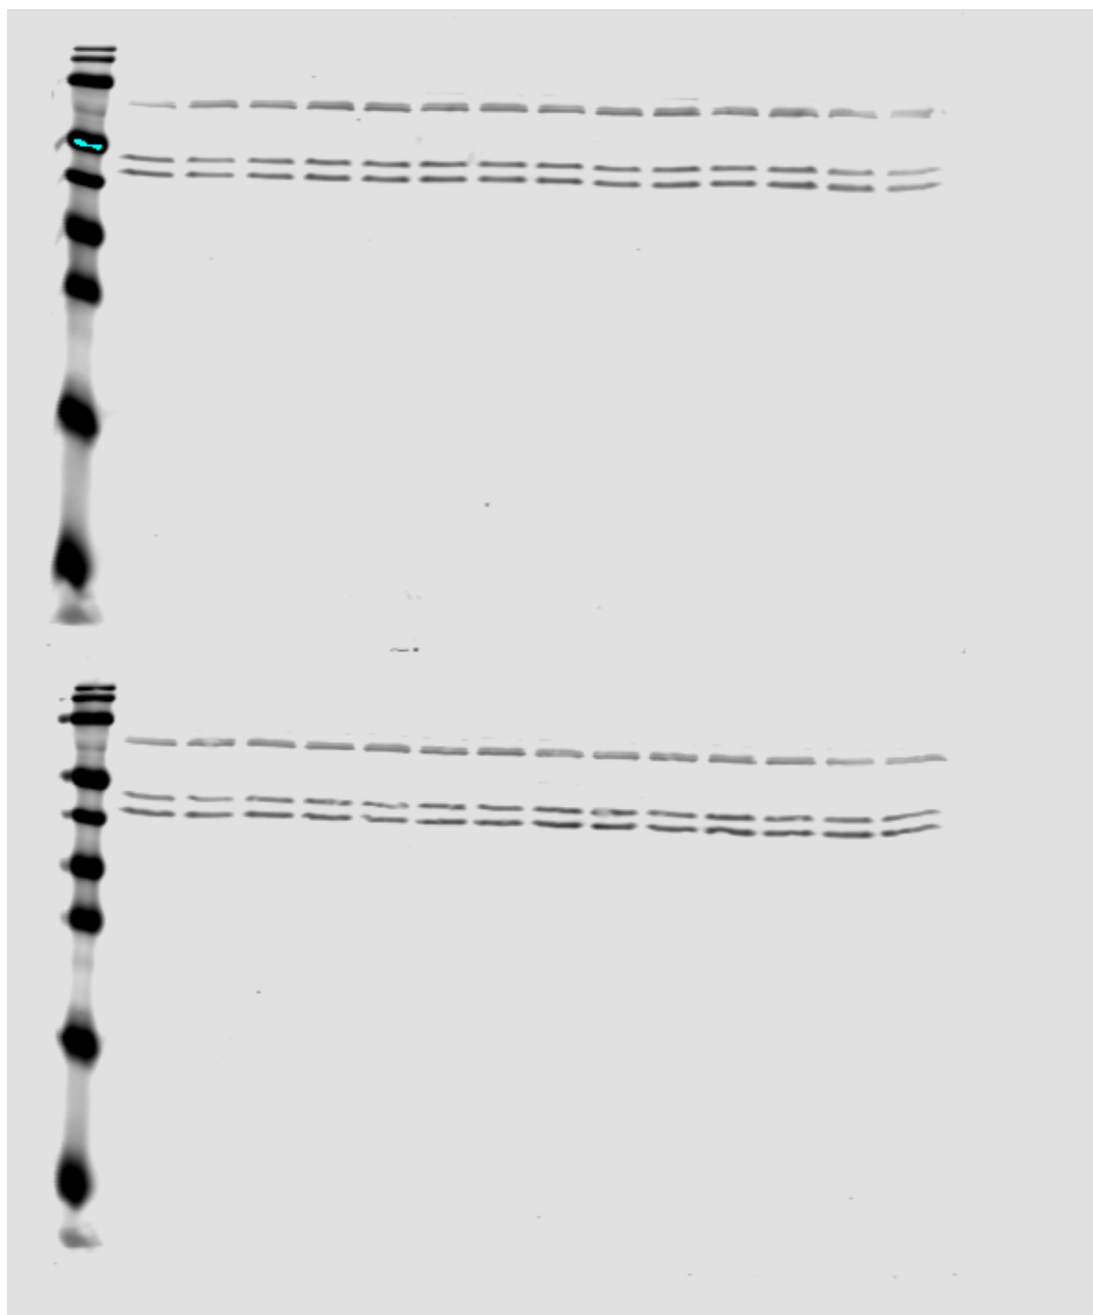

Acquisition Information

| # | Image ID   | Acquire Time          | Channels | Resolution | Intensities | Image Name                       | Comment |
|---|------------|-----------------------|----------|------------|-------------|----------------------------------|---------|
| 1 | 0000165_01 | 11 août 2017 00:00:00 | 700 800  | 169um      | 4,0 4,0     | WB8.8.17LCerebTubulinonMBPonGFAP |         |

Image Display Values

| Channel | Color                       | Minimum | Maximum | K |
|---------|-----------------------------|---------|---------|---|
| 800     | Gray Scale (Black on White) | 27,0    | 6180    | 0 |

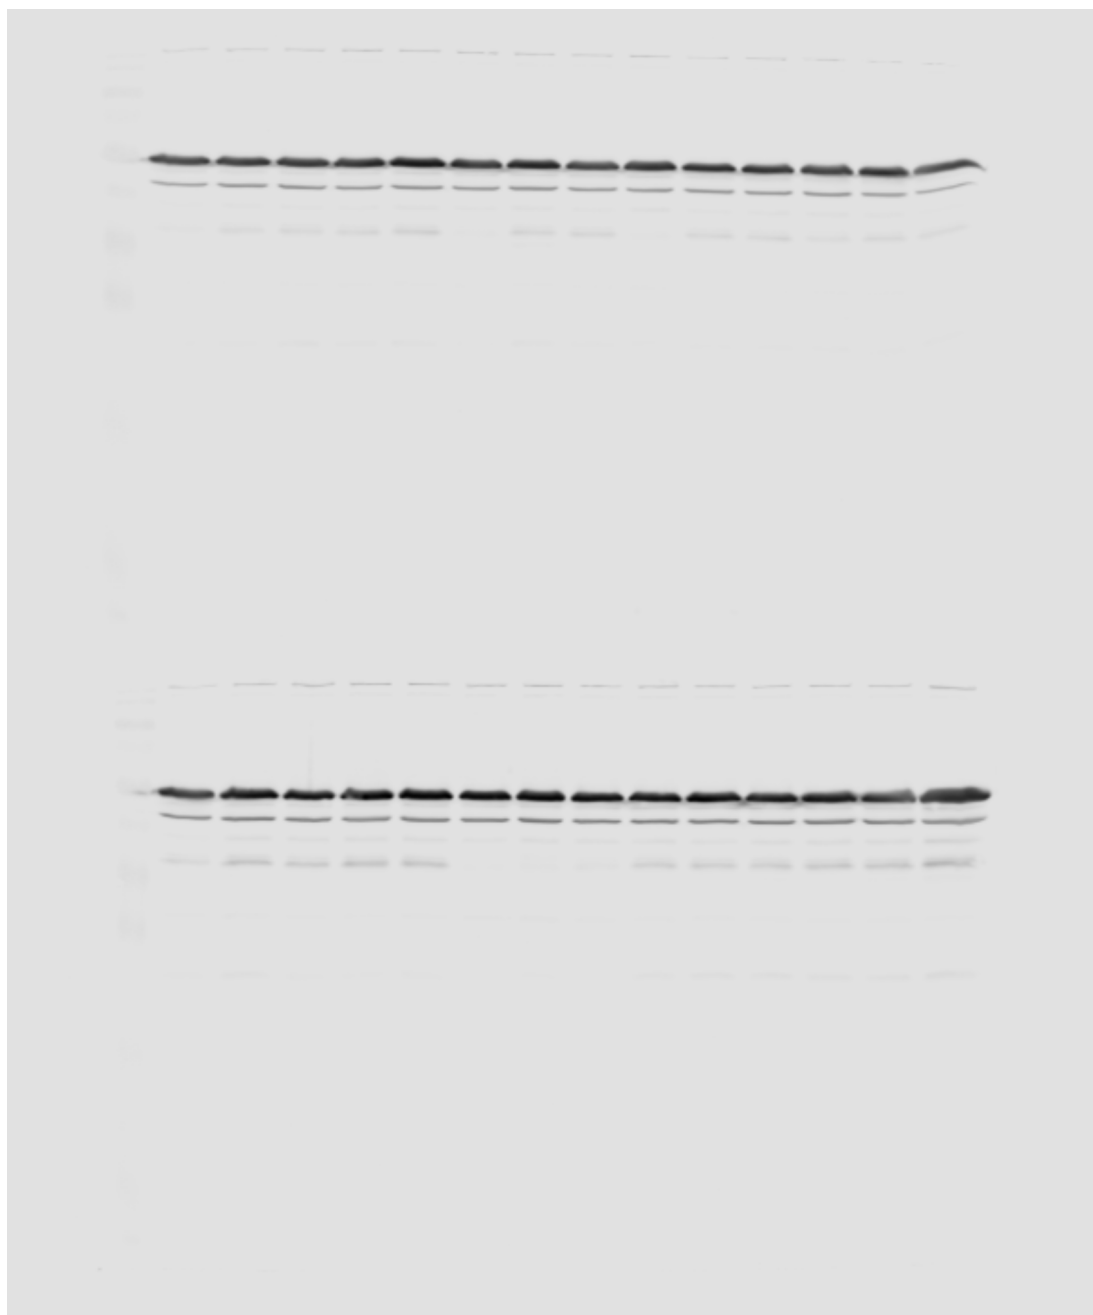

Acquisition Information

| # | Image ID   | Acquire Time          | Channels | Resolution | Intensities | Image Name                       | Comment |
|---|------------|-----------------------|----------|------------|-------------|----------------------------------|---------|
| 1 | 0000161_01 | 10 août 2017 00:00:00 | 700 800  | 169um      | 2,0 2,5     | WB7.8.17RCerebTubulinonMBPonGFAP |         |

Image Display Values

| Channel | Color                       | Minimum | Maximum | K |
|---------|-----------------------------|---------|---------|---|
| 800     | Gray Scale (Black on White) | 14,0    | 7840    | 0 |

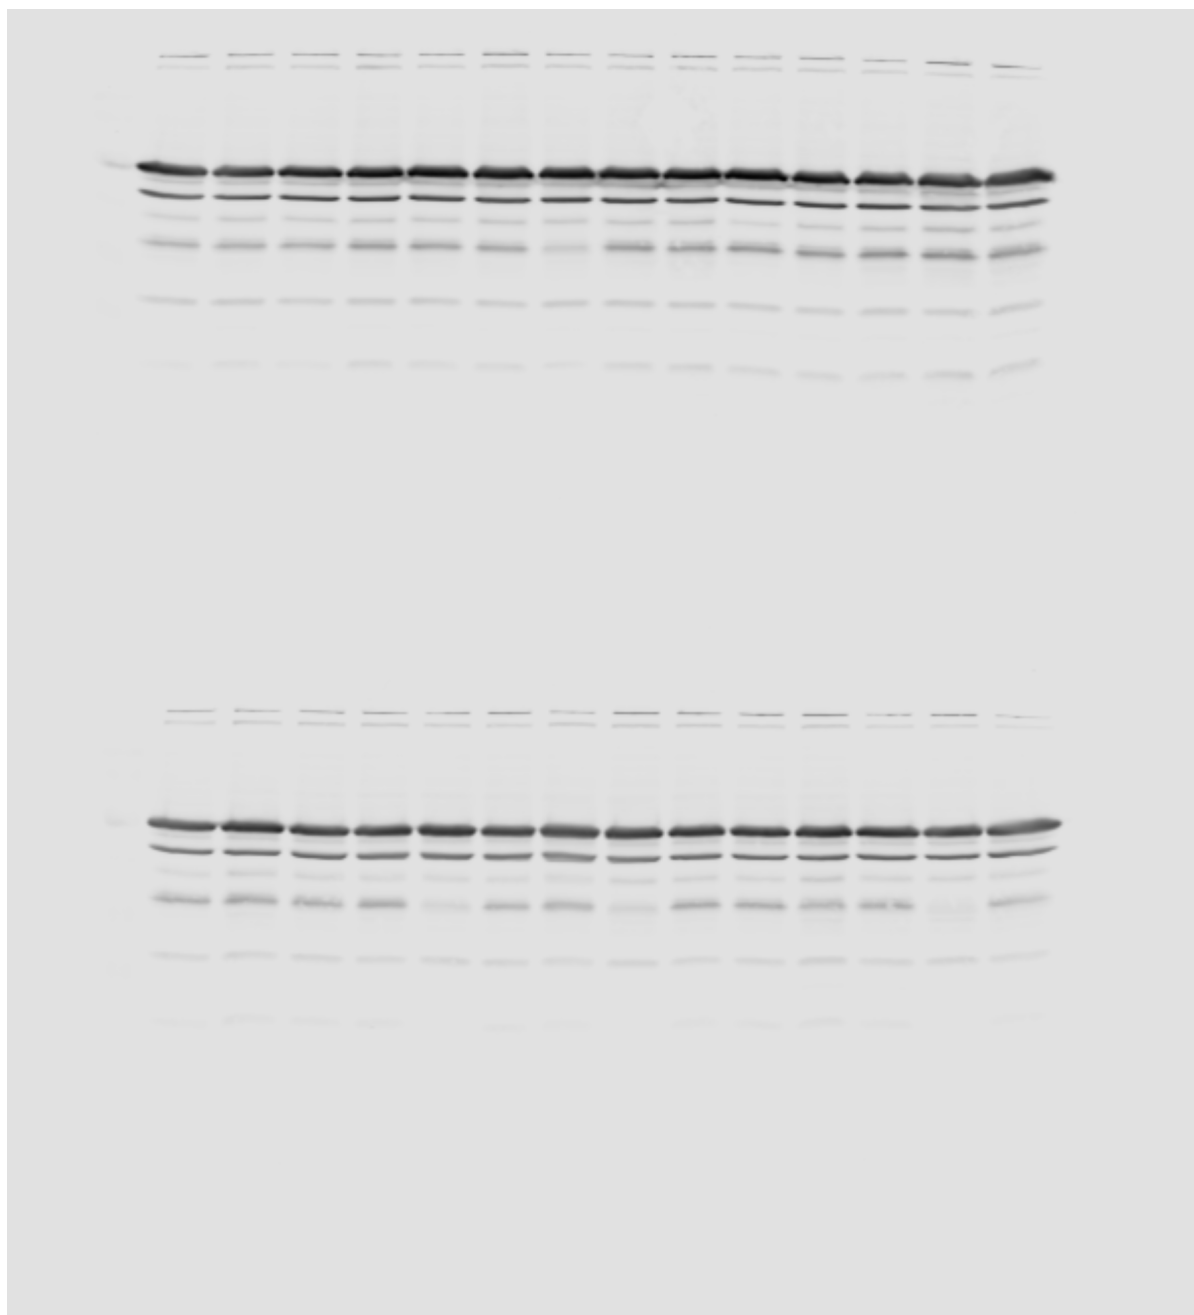

Supplement: Supplementary file [file 15337796]
